# Supplementary material for: Assessment of Groundwater Quality and Geochemical Characteristics in the Desertic Zone of Banaskantha Region of Western India
Source: Research Square preprint supplement (doi:10.21203/rs.3.rs-7534933/v1), 2025-09-19
Supplement: Supplementary file 1 [file 3cc54bedb78985bbc83773d3.xlsx]

## Sheet: Sheet1
				Desert Area of Banaskantha
		Sample Code	Temp. (°C)	pH	EC (µs/cm)	TDS	TH	Na+	K+	Ca+2	Mg+2	Cl-	SO42-	CO32-	HCO3-	NO3-	F-
		D1	35.2	7.21	2540	3814	420	580.54	11.21	160.27	210.14	380.47	120.34	10.12	180.45	55.67	1.25
		D2	36.8	9.34	2850	4192	1860	765.68	16.4	295.5	290.87	41.58	130.56	15.23	165.45	48.98	1.47
		D3	35	7.47	2740	5037	2440	1460.45	12.36	136.79	376.59	254.36	140.12	12.34	190.67	60.23	1.05
		D4	36.4	8.63	2980	4735	2000	780.54	14.8	268.37	310.24	390.47	110.78	20.45	150.12	42.34	0.47
		D5	34.7	7.25	3160	5128	1460	770.34	15.27	108.61	290.55	523.6	115.98	18.23	160.45	52.12	1.36
		D6	36.2	8.92	3360	5642	2400	1210.44	13.47	275.98	58.79	541.33	135.67	22.34	180.23	50.45	1.84
		D7	35.6	7.56	3550	5961	820	560.48	4.48	133.69	298.94	625.58	125.12	11.12	170.89	58.67	1.04
		D8	33.4	7.43	3790	6127	1940	1610.34	16.2	197.84	376.24	532.14	140.45	19.89	190.78	48.56	0.84
		D9	35.9	8.12	4120	4583	2760	150.32	10.8	260.45	420.34	256.93	130.78	14.56	160.23	47.45	1.21
		D10	35.3	8.05	4260	4929	860	780.14	13.8	73.46	150.35	654.32	122.45	17.67	175.45	54.23	1.65
		D11	38	7.67	4500	5348	860	440.88	9.4	187.73	376.47	840.14	145.23	13.45	185.67	60.78	0.87
		D12	33.8	7.8	8450	5472	960	620.78	14.88	117.28	314.15	512.34	138.12	21.45	200.12	53.45	1.47
		D13	38.2	9.96	4760	6078	2660	1320.88	7.84	260.14	270.86	445.74	125.34	16.12	168.34	51.78	1.25
		D14	36.2	8.14	5230	7153	1440	550.56	3.8	234.22	460.41	503.54	130.67	10.78	180.67	59.23	1.23
		D15	37.3	10.32	5640	6784	860	860.34	13.6	187.99	132.78	568.62	140.23	18.45	190.45	55.12	1.54
		D16	36.3	7.88	5940	7362	2040	1289.32	9.84	120.85	110.34	532.65	135.12	12.23	172.89	50.45	1.35
		D17	35.2	8.99	6380	6847	360	420.12	8.2	165.32	440.39	452.32	130.12	14.67	165.23	49.12	0.98
		D18	35.9	7.69	6260	7236	1100	1280.88	7.4	223.15	190.15	578.61	120.89	20.12	180.23	48.45	1.02
		D19	30.2	8.04	6470	7524	2600	490.26	18.74	234.63	410.24	361.78	140.78	19.34	175.67	60.34	0.65
		D20	35.5	7.49	6650	7865	720	690.88	8.6	186.74	320.41	580.65	125.12	16.45	168.45	55.78	1.54
		D21	33.2	10.25	9460	4253	1880	1480.67	10.6	251.42	295.66	452.36	130.56	14.12	170.67	54.23	1.36
		D22	33.6	7.72	7300	5618	2560	740.88	14	135.66	58.88	487.66	125.89	15.34	160.45	57.12	0.87
		D23	32.4	7.55	7420	5921	980	580.56	12.4	91.81	220.45	520.47	140.12	18.23	180.23	50.67	0.47
		D24	30.9	8.01	7680	1531	640	140.88	7.2	180.62	98.94	777.41	115.78	22.45	150.78	52.34	1.35
		D25	32.4	7.8	7920	4846	2320	1580.88	5.62	204.87	280.56	531.12	130.67	13.89	170.45	48.12	1.45
		D26	36.5	7.34	8190	5034	2080	1720.88	10.4	125.68	320.32	695.36	135.23	12.34	160.67	56.78	1.55
		D27	32.8	7.98	8370	5213	720	770.45	15	178.58	390.66	472.65	130.45	10.78	155.89	50.23	1.25
		D28	33	7.64	8660	6019	1960	1670.45	11.4	192.74	290.74	475.36	120.34	14.23	170.56	49.12	0.65
		D29	34.1	8.76	8850	7025	2070	1280.88	16.6	202.13	282.53	684.21	130.78	16.45	180.12	58.23	1.36
		D30	30.8	8.15	9320	8423	2760	450.98	12.8	215.94	370.86	532.74	140.12	19.67	190.78	55.45	2.54
		D31	31.6	7.88	9240	7651	1820	1395.48	14.6	190.48	342.57	631.69	115.23	11.45	160.23	47.67	2.35
		D32	33.6	8.22	9420	8165	2180	532.76	11	98.21	300.43	471.65	125.45	14.12	155.78	48.23	1.87
		D33	34.6	7.53	9760	8324	1940	1684.32	10.8	157.86	280.98	553.46	135.67	16.23	180.45	52.12	1.25
		D34	35.1	8.32	9630	8729	340	540.66	5.6	210.34	78.97	685.69	130.45	13.56	170.67	50.45	1.35
		D35	32.6	10.92	10120	9038	1280	950.32	17.4	60.38	420.14	708.49	120.12	15.78	160.45	58.23	0.65
		D36	32.9	7.45	10350	8531	1820	1180.78	9.29	109.39	340.8	540.66	140.56	17.34	175.23	53.45	0.25
		D37	31.7	8.12	10560	8867	860	920.84	5.84	141.77	460.41	684.95	125.12	12.45	165.12	49.67	1.02
		D38	36.1	7.29	10800	8649	1360	1090.67	8.68	229.88	340.15	630.47	130.78	16.67	185.78	50.23	1.5
		D39	37.6	8.1	10960	8926	1000	770.78	14.4	236.93	210.61	583.14	115.34	18.23	155.67	56.45	1.6
		D40	36.2	8.35	11000	2781	2360	1280.14	11.8	175.23	324.56	486.25	130.12	10.89	160.12	52.34	1.55
		D41	34.6	9.81	2104	3187	2220	290.56	6.8	91.56	290.75	585.65	125.45	14.45	175.23	48.12	1.25
		D42	34.1	7.73	2560	3359	1840	390.54	4.2	75.33	285.16	586.14	135.23	13.34	180.56	49.45	1.54
		D43	34.5	10.25	2900	3154	1560	980.76	17.17	83.04	345.14	620.58	130.12	11.23	155.67	56.78	1.25
		D44	36.2	7.58	3150	2957	820	1190.67	7.4	57.66	320.82	543.85	140.45	18.12	170.12	50.67	1.45
		D45	31.2	8.18	3760	2816	2340	1380.88	15.47	114.79	315.48	653.17	125.34	14.67	160.23	57.12	1.65
		D46	31.6	10.66	4380	2719	660	760.22	4.84	137.88	122.84	695.85	135.12	13.78	175.45	58.23	1.4
		D47	32.4	7.95	4900	2562	980	680.14	3.8	123.54	315.67	652.19	120.89	15.45	150.67	49.12	1.25
		D48	32.6	8.13	5420	2438	860	970.45	6.33	142.27	345.42	630.85	130.67	16.89	165.45	53.45	1.3
		D49	33	7.49	5860	2284	1260	1370.44	11.6	167.58	450.34	623.47	125.12	13.56	180.23	50.12	1.25
		D50	34.5	8.02	6120	2075	860	1650.98	4.8	184.21	298.79	320.95	140.12	12.34	170.12	51.78	1.33
		D51	34.9	7.79	6400	1873	1980	710.34	16.45	202.59	380.84	462.67	135.23	14.45	160.89	56.12	1.24
		D52	35.5	7.44	6450	1689	1660	1320.47	10.78	68.97	301.27	562.85	120.67	13.67	175.12	50.34	1.36
		D53	34.6	9.28	7130	1443	2080	680.88	15.6	138.28	316.38	547.95	125.45	12.45	160.78	53.45	1.52
		D54	33.4	8.06	7740	1521	2040	1360.22	6.2	166.47	310.16	520.85	130.78	14.67	170.23	54.12	1.69
		D55	34.2	7.52	8250	1487	780	960.54	17.29	182.13	460.41	650.74	140.34	13.56	175.78	58.12	0.48
		D56	31.9	8.71	8650	7432	660	690.12	12.22	251.63	134.97	623.47	125.12	12.34	160.45	49.45	0.75
		D57	36.1	8.08	9425	2958	1860	470.22	8.4	241.36	410.47	654.32	130.45	14.45	155.67	51.23	1.65
		D58	33	7.83	9650	3175	2120	1750.34	13.2	112.87	295.78	584.62	135.12	13.12	170.12	50.34	1.35
		D59	34.7	8.5	10300	2845	2520	1180.88	18.47	240.65	280.47	610.58	120.23	12.67	175.67	56.23	1.13
			Temp. (°C)	pH	EC (µs/cm)	TDS	TH	Na+	K+	Ca+2	Mg+2	Cl-	SO42-	CO32-	HCO3-	NO3-	F-
		Min.	30.2	7.21	2104	1443	340	140.88	3.8	57.66	58.79	41.58	110.78	10.12	150.12	42.34	0.25
		Max.	38.2	10.92	11000	9038	2760	1750.34	18.74	295.5	460.41	840.14	145.23	22.45	200.12	60.78	2.54
		Mean	34.3356	8.24322	6674.39	5141.27	1569.32	952.34	11.1447	169.521	296.604	547.69	129.569	15.16	170.525	52.8571	1.2739
		Std. Dev.	1.89099	0.899217	2638.01	2327.6	696.896	427.488	4.16523	60.2857	101.64	130.663	7.93704	3.04033	11.3202	3.96531	0.413935

## Sheet: Sheet2
Sample Code	D1	D2	D3	D4	D5	D6	D7	D8	D9	D10	D11	D12	D13	D14	D15	D16	D17	D18	D19	D20	D21	D22	D23	D24	D25	D26	D27	D28	D29	D30	D31	D32	D33	D34	D35	D36	D37	D38	D39	D40	D41	D42	D43	D44	D45	D46	D47	D48	D49
pH	7.21	9.34	7.47	8.63	7.25	8.92	7.56	7.43	8.12	8.05	7.67	7.8	9.96	8.14	10.32	7.88	8.99	7.69	8.04	7.49	10.25	7.72	7.55	8.01	7.8	7.34	7.98	7.64	8.76	8.15	7.88	8.22	7.53	8.32	10.92	7.45	8.12	7.29	8.1	8.35	9.81	7.73	10.25	7.58	8.18	10.66	7.95	8.13	7.49
Qi=Ci/Si*100	84.8235	109.882	87.8824	101.529	85.2941	104.941	88.9412	87.4118	95.5294	94.7059	90.2353	91.7647	117.176	95.7647	121.412	92.7059	105.765	90.4706	94.5882	88.1176	120.588	90.8235	88.8235	94.2353	91.7647	86.3529	93.8824	89.8824	103.059	95.8824	92.7059	96.7059	88.5882	97.8824	128.471	87.6471	95.5294	85.7647	95.2941	98.2353	115.412	90.9412	120.588	89.1765	96.2353	125.412	93.5294	95.6471	88.1176
SIi = Wi.Qi	6.19212	8.02141	6.41541	7.41165	6.22647	7.66071	6.49271	6.38106	6.97365	6.91353	6.58718	6.69882	8.55388	6.99082	8.86306	6.76753	7.72082	6.60435	6.90494	6.43259	8.80294	6.63012	6.48412	6.87918	6.69882	6.30376	6.85341	6.56141	7.52329	6.99941	6.76753	7.05953	6.46694	7.14541	9.37835	6.39824	6.97365	6.26082	6.95647	7.17118	8.42506	6.63871	8.80294	6.50988	7.02518	9.15506	6.82765	6.98224	6.43259
TDS	3814	4192	5037	4735	5128	5642	5961	6127	4583	4929	5348	5472	6078	7153	6784	7362	6847	7236	7524	7865	4253	5618	5921	1531	4846	5034	5213	6019	7025	8423	7651	8165	8324	8729	9038	8531	8867	8649	8926	2781	3187	3359	3154	2957	2816	2719	2562	2438	2284
Qi=Ci/Si*100	762.8	838.4	1007.4	947	1025.6	1128.4	1192.2	1225.4	916.6	985.8	1069.6	1094.4	1215.6	1430.6	1356.8	1472.4	1369.4	1447.2	1504.8	1573	850.6	1123.6	1184.2	306.2	969.2	1006.8	1042.6	1203.8	1405	1684.6	1530.2	1633	1664.8	1745.8	1807.6	1706.2	1773.4	1729.8	1785.2	556.2	637.4	671.8	630.8	591.4	563.2	543.8	512.4	487.6	456.8
SIi = Wi.Qi	93.0616	102.285	122.903	115.534	125.123	137.665	145.448	149.499	111.825	120.268	130.491	133.517	148.303	174.533	165.53	179.633	167.067	176.558	183.586	191.906	103.773	137.079	144.472	37.3564	118.242	122.83	127.197	146.864	171.41	205.521	186.684	199.226	203.106	212.988	220.527	208.156	216.355	211.036	217.794	67.8564	77.7628	81.9596	76.9576	72.1508	68.7104	66.3436	62.5128	59.4872	55.7296
TH	420	1860	2440	2000	1460	2400	820	1940	2760	860	860	960	2660	1440	860	2040	360	1100	2600	720	1880	2560	980	640	2320	2080	720	1960	2070	2760	1820	2180	1940	340	1280	1820	860	1360	1000	2360	2220	1840	1560	820	2340	660	980	860	1260
Qi=Ci/Si*100	210	930	1220	1000	730	1200	410	970	1380	430	430	480	1330	720	430	1020	180	550	1300	360	940	1280	490	320	1160	1040	360	980	1035	1380	910	1090	970	170	640	910	430	680	500	1180	1110	920	780	410	1170	330	490	430	630
SIi = Wi.Qi	15.33	67.89	89.06	73	53.29	87.6	29.93	70.81	100.74	31.39	31.39	35.04	97.09	52.56	31.39	74.46	13.14	40.15	94.9	26.28	68.62	93.44	35.77	23.36	84.68	75.92	26.28	71.54	75.555	100.74	66.43	79.57	70.81	12.41	46.72	66.43	31.39	49.64	36.5	86.14	81.03	67.16	56.94	29.93	85.41	24.09	35.77	31.39	45.99
Na+	580.54	765.68	1460.45	780.54	770.34	1210.44	560.48	1610.34	150.32	780.14	440.88	620.78	1320.88	550.56	860.34	1289.32	420.12	1280.88	490.26	690.88	1480.67	740.88	580.56	140.88	1580.88	1720.88	770.45	1670.45	1280.88	450.98	1395.48	532.76	1684.32	540.66	950.32	1180.78	920.84	1090.67	770.78	1280.14	290.56	390.54	980.76	1190.67	1380.88	760.22	680.14	970.45	1370.44
Qi=Ci/Si*100	290.27	382.84	730.225	390.27	385.17	605.22	280.24	805.17	75.16	390.07	220.44	310.39	660.44	275.28	430.17	644.66	210.06	640.44	245.13	345.44	740.335	370.44	290.28	70.44	790.44	860.44	385.225	835.225	640.44	225.49	697.74	266.38	842.16	270.33	475.16	590.39	460.42	545.335	385.39	640.07	145.28	195.27	490.38	595.335	690.44	380.11	340.07	485.225	685.22
SIi = Wi.Qi	14.2232	18.7592	35.781	19.1232	18.8733	29.6558	13.7318	39.4533	3.68284	19.1134	10.8016	15.2091	32.3616	13.4887	21.0783	31.5883	10.2929	31.3816	12.0114	16.9266	36.2764	18.1516	14.2237	3.45156	38.7316	42.1616	18.876	40.926	31.3816	11.049	34.1893	13.0526	41.2658	13.2462	23.2828	28.9291	22.5606	26.7214	18.8841	31.3634	7.11872	9.56823	24.0286	29.1714	33.8316	18.6254	16.6634	23.776	33.5758
K+	11.21	16.4	12.36	14.8	15.27	13.47	4.48	16.2	10.8	13.8	9.4	14.88	7.84	3.8	13.6	9.84	8.2	7.4	18.74	8.6	10.6	14	12.4	7.2	5.62	10.4	15	11.4	16.6	12.8	14.6	11	10.8	5.6	17.4	9.29	5.84	8.68	14.4	11.8	6.8	4.2	17.17	7.4	15.47	4.84	3.8	6.33	11.6
Qi=Ci/Si*100	93.4167	136.667	103	123.333	127.25	112.25	37.3333	135	90	115	78.3333	124	65.3333	31.6667	113.333	82	68.3333	61.6667	156.167	71.6667	88.3333	116.667	103.333	60	46.8333	86.6667	125	95	138.333	106.667	121.667	91.6667	90	46.6667	145	77.4167	48.6667	72.3333	120	98.3333	56.6667	35	143.083	61.6667	128.917	40.3333	31.6667	52.75	96.6667
SIi = Wi.Qi	4.57742	6.69667	5.047	6.04333	6.23525	5.50025	1.82933	6.615	4.41	5.635	3.83833	6.076	3.20133	1.55167	5.55333	4.018	3.34833	3.02167	7.65217	3.51167	4.32833	5.71667	5.06333	2.94	2.29483	4.24667	6.125	4.655	6.77833	5.22667	5.96167	4.49167	4.41	2.28667	7.105	3.79342	2.38467	3.54433	5.88	4.81833	2.77667	1.715	7.01108	3.02167	6.31692	1.97633	1.55167	2.58475	4.73667
Ca+2	160.27	295.5	136.79	268.37	108.61	275.98	133.69	197.84	260.45	73.46	187.73	117.28	260.14	234.22	187.99	120.85	165.32	223.15	234.63	186.74	251.42	135.66	91.81	180.62	204.87	125.68	178.58	192.74	202.13	215.94	190.48	98.21	157.86	210.34	60.38	109.39	141.77	229.88	236.93	175.23	91.56	75.33	83.04	57.66	114.79	137.88	123.54	142.27	167.58
Qi=Ci/Si*100	80.135	147.75	68.395	134.185	54.305	137.99	66.845	98.92	130.225	36.73	93.865	58.64	130.07	117.11	93.995	60.425	82.66	111.575	117.315	93.37	125.71	67.83	45.905	90.31	102.435	62.84	89.29	96.37	101.065	107.97	95.24	49.105	78.93	105.17	30.19	54.695	70.885	114.94	118.465	87.615	45.78	37.665	41.52	28.83	57.395	68.94	61.77	71.135	83.79
SIi = Wi.Qi	5.84985	10.7858	4.99283	9.79551	3.96427	10.0733	4.87968	7.22116	9.50642	2.68129	6.85214	4.28072	9.49511	8.54903	6.86163	4.41102	6.03418	8.14498	8.56399	6.81601	9.17683	4.95159	3.35106	6.59263	7.47775	4.58732	6.51817	7.03501	7.37774	7.88181	6.95252	3.58466	5.76189	7.67741	2.20387	3.99274	5.1746	8.39062	8.64794	6.39589	3.34194	2.74954	3.03096	2.10459	4.18984	5.03262	4.50921	5.19285	6.11667
Mg+2	210.14	290.87	376.59	310.24	290.55	58.79	298.94	376.24	420.34	150.35	376.47	314.15	270.86	460.41	132.78	110.34	440.39	190.15	410.24	320.41	295.66	58.88	220.45	98.94	280.56	320.32	390.66	290.74	282.53	370.86	342.57	300.43	280.98	78.97	420.14	340.8	460.41	340.15	210.61	324.56	290.75	285.16	345.14	320.82	315.48	122.84	315.67	345.42	450.34
Qi=Ci/Si*100	700.467	969.567	1255.3	1034.13	968.5	195.967	996.467	1254.13	1401.13	501.167	1254.9	1047.17	902.867	1534.7	442.6	367.8	1467.97	633.833	1367.47	1068.03	985.533	196.267	734.833	329.8	935.2	1067.73	1302.2	969.133	941.767	1236.2	1141.9	1001.43	936.6	263.233	1400.47	1136	1534.7	1133.83	702.033	1081.87	969.167	950.533	1150.47	1069.4	1051.6	409.467	1052.23	1151.4	1501.13
SIi = Wi.Qi	51.1341	70.7784	91.6369	75.4917	70.7005	14.3056	72.7421	91.5517	102.283	36.5852	91.6077	76.4432	65.9093	112.033	32.3098	26.8494	107.162	46.2698	99.8251	77.9664	71.9439	14.3275	53.6428	24.0754	68.2696	77.9445	95.0606	70.7467	68.749	90.2426	83.3587	73.1046	68.3718	19.216	102.234	82.928	112.033	82.7698	51.2484	78.9763	70.7492	69.3889	83.9841	78.0662	76.7668	29.8911	76.813	84.0522	109.583
Cl-	380.47	41.58	254.36	390.47	523.6	541.33	625.58	532.14	256.93	654.32	840.14	512.34	445.74	503.54	568.62	532.65	452.32	578.61	361.78	580.65	452.36	487.66	520.47	777.41	531.12	695.36	472.65	475.36	684.21	532.74	631.69	471.65	553.46	685.69	708.49	540.66	684.95	630.47	583.14	486.25	585.65	586.14	620.58	543.85	653.17	695.85	652.19	630.85	623.47
Qi=Ci/Si*100	152.188	16.632	101.744	156.188	209.44	216.532	250.232	212.856	102.772	261.728	336.056	204.936	178.296	201.416	227.448	213.06	180.928	231.444	144.712	232.26	180.944	195.064	208.188	310.964	212.448	278.144	189.06	190.144	273.684	213.096	252.676	188.66	221.384	274.276	283.396	216.264	273.98	252.188	233.256	194.5	234.26	234.456	248.232	217.54	261.268	278.34	260.876	252.34	249.388
SIi = Wi.Qi	14.9144	1.62994	9.97091	15.3064	20.5251	21.2201	24.5227	20.8599	10.0717	25.6493	32.9335	20.0837	17.473	19.7388	22.2899	20.8799	17.7309	22.6815	14.1818	22.7615	17.7325	19.1163	20.4024	30.4745	20.8199	27.2581	18.5279	18.6341	26.821	20.8834	24.7622	18.4887	21.6956	26.879	27.7728	21.1939	26.85	24.7144	22.8591	19.061	22.9575	22.9767	24.3267	21.3189	25.6043	27.2773	25.5658	24.7293	24.44
SO42-	120.34	130.56	140.12	110.78	115.98	135.67	125.12	140.45	130.78	122.45	145.23	138.12	125.34	130.67	140.23	135.12	130.12	120.89	140.78	125.12	130.56	125.89	140.12	115.78	130.67	135.23	130.45	120.34	130.78	140.12	115.23	125.45	135.67	130.45	120.12	140.56	125.12	130.78	115.34	130.12	125.45	135.23	130.12	140.45	125.34	135.12	120.89	130.67	125.12
Qi=Ci/Si*100	60.17	65.28	70.06	55.39	57.99	67.835	62.56	70.225	65.39	61.225	72.615	69.06	62.67	65.335	70.115	67.56	65.06	60.445	70.39	62.56	65.28	62.945	70.06	57.89	65.335	67.615	65.225	60.17	65.39	70.06	57.615	62.725	67.835	65.225	60.06	70.28	62.56	65.39	57.67	65.06	62.725	67.615	65.06	70.225	62.67	67.56	60.445	65.335	62.56
SIi = Wi.Qi	4.39241	4.76544	5.11438	4.04347	4.23327	4.95195	4.56688	5.12642	4.77347	4.46942	5.30089	5.04138	4.57491	4.76945	5.11839	4.93188	4.74938	4.41249	5.13847	4.56688	4.76544	4.59498	5.11438	4.22597	4.76945	4.93589	4.76142	4.39241	4.77347	5.11438	4.20589	4.57892	4.95195	4.76142	4.38438	5.13044	4.56688	4.77347	4.20991	4.74938	4.57892	4.93589	4.74938	5.12642	4.57491	4.93188	4.41249	4.76945	4.56688
HCO3-	180.45	165.45	190.67	150.12	160.45	180.23	170.89	190.78	160.23	175.45	185.67	200.12	168.34	180.67	190.45	172.89	165.23	180.23	175.67	168.45	170.67	160.45	180.23	150.78	170.45	160.67	155.89	170.56	180.12	190.78	160.23	155.78	180.45	170.67	160.45	175.23	165.12	185.78	155.67	160.12	175.23	180.56	155.67	170.12	160.23	175.45	150.67	165.45	180.23
Qi=Ci/Si*100	150.375	137.875	158.892	125.1	133.708	150.192	142.408	158.983	133.525	146.208	154.725	166.767	140.283	150.558	158.708	144.075	137.692	150.192	146.392	140.375	142.225	133.708	150.192	125.65	142.042	133.892	129.908	142.133	150.1	158.983	133.525	129.817	150.375	142.225	133.708	146.025	137.6	154.817	129.725	133.433	146.025	150.467	129.725	141.767	133.525	146.208	125.558	137.875	150.192
SIi = Wi.Qi	10.9774	10.0649	11.5991	9.1323	9.76071	10.964	10.3958	11.6058	9.74732	10.6732	11.2949	12.174	10.2407	10.9908	11.5857	10.5175	10.0515	10.964	10.6866	10.2474	10.3824	9.76071	10.964	9.17245	10.369	9.77409	9.48331	10.3757	10.9573	11.6058	9.74732	9.47662	10.9774	10.3824	9.76071	10.6598	10.0448	11.3016	9.46992	9.74063	10.6598	10.9841	9.46992	10.349	9.74732	10.6732	9.16576	10.0649	10.964
NO3-	55.67	48.98	60.23	42.34	52.12	50.45	58.67	48.56	47.45	54.23	60.78	53.45	51.78	59.23	55.12	50.45	49.12	48.45	60.34	55.78	54.23	57.12	50.67	52.34	48.12	56.78	50.23	49.12	58.23	55.45	47.67	48.23	52.12	50.45	58.23	53.45	49.67	50.23	56.45	52.34	48.12	49.45	56.78	50.67	57.12	58.23	49.12	53.45	50.12
Qi=Ci/Si*100	123.711	108.844	133.844	94.0889	115.822	112.111	130.378	107.911	105.444	120.511	135.067	118.778	115.067	131.622	122.489	112.111	109.156	107.667	134.089	123.956	120.511	126.933	112.6	116.311	106.933	126.178	111.622	109.156	129.4	123.222	105.933	107.178	115.822	112.111	129.4	118.778	110.378	111.622	125.444	116.311	106.933	109.889	126.178	112.6	126.933	129.4	109.156	118.778	111.378
SIi = Wi.Qi	15.0928	13.279	16.329	11.4788	14.1303	13.6776	15.9061	13.1652	12.8642	14.7024	16.4781	14.4909	14.0381	16.0579	14.9436	13.6776	13.317	13.1353	16.3588	15.1226	14.7024	15.4859	13.7372	14.19	13.0459	15.3937	13.6179	13.317	15.7868	15.0331	12.9239	13.0757	14.1303	13.6776	15.7868	14.4909	13.4661	13.6179	15.3042	14.19	13.0459	13.4064	15.3937	13.7372	15.4859	15.7868	13.317	14.4909	13.5881
F-	1.25	1.47	1.05	0.47	1.36	1.84	1.04	0.84	1.21	1.65	0.87	1.47	1.25	1.23	1.54	1.35	0.98	1.02	0.65	1.54	1.36	0.87	0.47	1.35	1.45	1.55	1.25	0.65	1.36	2.54	2.35	1.87	1.25	1.35	0.65	0.25	1.02	1.5	1.6	1.55	1.25	1.54	1.25	1.45	1.65	1.4	1.25	1.3	1.25
Qi=Ci/Si*100	83.3333	98	70	31.3333	90.6667	122.667	69.3333	56	80.6667	110	58	98	83.3333	82	102.667	90	65.3333	68	43.3333	102.667	90.6667	58	31.3333	90	96.6667	103.333	83.3333	43.3333	90.6667	169.333	156.667	124.667	83.3333	90	43.3333	16.6667	68	100	106.667	103.333	83.3333	102.667	83.3333	96.6667	110	93.3333	83.3333	86.6667	83.3333
SIi = Wi.Qi	10.1667	11.956	8.54	3.82267	11.0613	14.9653	8.45867	6.832	9.84133	13.42	7.076	11.956	10.1667	10.004	12.5253	10.98	7.97067	8.296	5.28667	12.5253	11.0613	7.076	3.82267	10.98	11.7933	12.6067	10.1667	5.28667	11.0613	20.6587	19.1133	15.2093	10.1667	10.98	5.28667	2.03333	8.296	12.2	13.0133	12.6067	10.1667	12.5253	10.1667	11.7933	13.42	11.3867	10.1667	10.5733	10.1667
WQI	245.912	326.911	407.389	350.183	344.124	358.239	338.904	429.12	386.719	291.5	354.652	341.011	421.408	431.267	338.049	388.714	368.584	371.62	465.095	395.063	361.566	336.33	317.048	173.698	387.193	403.962	343.468	400.334	438.175	500.956	461.097	440.918	462.114	341.65	474.443	454.136	460.095	454.97	410.768	343.069	312.613	304.008	324.862	283.279	351.083	225.17	267.276	278.093	325.89
Chemical parameter	pH	TDS	TH	Na	K	Ca	Mg	Cl	SO4	HCO3	NO3	F		WQI Range	Type of water	No. of samples	%sample
BIS 2012 (Si)	8.5	500	200	200	12	200	30	250	200	120	45	1.5		<50	Excellent	0	0
Weight (wi)	3	5	3	2	2	3	3	4	3	3	5	5	41	50-100	Good	0	0
Wi	0.0731707	0.121951	0.0731707	0.0487805	0.0487805	0.0731707	0.0731707	0.097561	0.0731707	0.0731707	0.121951	0.121951		100-200	Poor	1	0.0169492
														200-300	Very Poor	11	0.186441
														>300	Unsuitable	47	0.79661
[truncated: 11 more columns]
